# Supplementary material
Source: ML conference proceedings conference paper supplement (https://proceedings.neurips.cc/paper_files/paper/2020/hash/1b742ae215adf18b75449c6e272fd92d-Abstract.html)
Supplement: Supplementary file [file 1b742ae215adf18b75449c6e272fd92d-Supplemental.pdf]

## A Proof of the upper bound

**Complete proof of the Theorem 1** In the following subsections, we hierarchically build the construction for our proof of Theorem 1. We have shown how we approximate a single weight in Subsection 3.2. This first step is slightly different than the sketch above, in the sense that we approximate a single weight with a ReLU random network, rather than a linear one. We then approximate a single ReLU neuron in Subsection A.1, and a single layer in Subsection A.2. Finally, we approximate the whole network in Subsection A.3, which completes the proof of Theorem 1.

### A.1 Approximating a single neuron

In this subsection we prove the following lemma on approximating a (univariate) linear function  $\mathbf{w}^T \mathbf{x}$ , which highlights the main idea in approximating a (multivariate) linear function  $\mathbf{W} \mathbf{x}$  (see Lemma 3 in Subsection A.2).

**Lemma 2.** (Approximating a univariate linear function) Consider a randomly initialized neural network  $g(\mathbf{x}) = \mathbf{v}^T \sigma(\mathbf{M} \mathbf{x})$  with  $\mathbf{x} \in \mathbb{R}^d$  such that  $\mathbf{M} \in \mathbb{R}^{C d \log \frac{d}{\epsilon} \times d}$  and  $\mathbf{v} \in \mathbb{R}^{C d \log \frac{d}{\epsilon}}$ , where each weight is initialized independently from the distribution  $U[-1, 1]$ .

Let  $\hat{g}(x) = (\mathbf{s} \odot \mathbf{v})^T \sigma((\mathbf{T} \odot \mathbf{M}) \mathbf{x})$  be the pruned network for a choice of binary vector  $\mathbf{s}$  and matrix  $\mathbf{T}$ . If  $f_{\mathbf{w}}(\mathbf{x}) = \mathbf{w}^T \mathbf{x}$  be the linear function, then with probability at least  $1 - \epsilon$ ,

$$\forall \mathbf{w} : \|\mathbf{w}\|_{\infty} \leq 1, \exists \mathbf{s}, \mathbf{T} : \sup_{\mathbf{x} : \|\mathbf{x}\|_{\infty} \leq 1} \|f_{\mathbf{w}}(\mathbf{x}) - \hat{g}(\mathbf{x})\| < \epsilon.$$

*Proof.* We will approximate  $\mathbf{w}^T \mathbf{x}$  coordinate-wise. See Figure 3 for illustration.

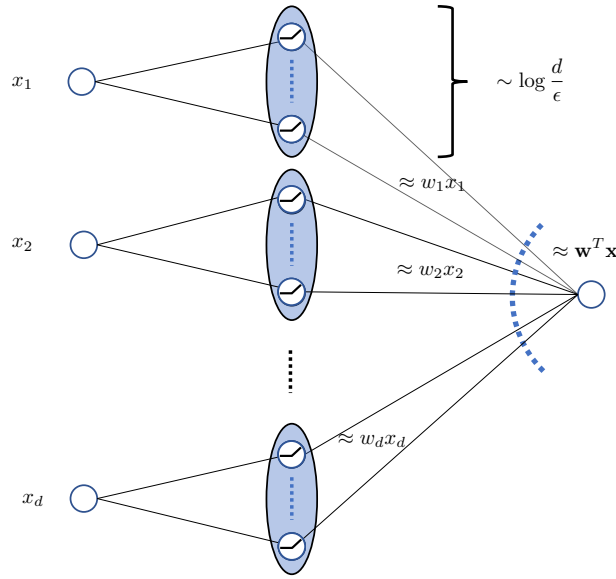

Figure 3: Approximating a single neuron  $\sigma(\mathbf{w}^T x)$ : A diagram showing our construction to approximate a single neuron  $\sigma(\mathbf{w}^T x)$ . We construct the first hidden layer with  $d$  blocks (shown in blue), where each block contains  $k = O(\log \frac{d}{\epsilon})$  neurons. We first pre-process the weights by pruning the first layer so that it has a block structure as shown. For ease of visualization, we only show two connections per block, i.e., each neuron in the  $i^{\text{th}}$  block is connected to  $x_i$  and (before pruning) the output neuron. We then use Lemma 1 to show that second layer can be pruned so that  $i^{\text{th}}$  block approximates  $w_i x_i$ . Overall, the construction approximates  $\mathbf{w}^T \mathbf{x}$ . Note that, after an initial pre-processing of the first layer, we only prune the second layer so that we can re-use the weights to approximate other neurons in a layer.

**Step 1: Pre-processing M** We first begin by pruning  $\mathbf{M}$  to create a block-diagonal matrix  $\mathbf{M}'$ . Specifically, we create  $\mathbf{M}'$  by only keep the following non-zero entries:

$$\mathbf{M}' = \begin{bmatrix} \mathbf{u}_1 & 0 & \dots & 0 \\ 0 & \mathbf{u}_2 & \dots & 0 \\ \vdots & \vdots & \dots & 0 \\ 0 & 0 & \dots & \mathbf{u}_d \end{bmatrix}, \quad \text{where } \mathbf{u}_i \in \mathbb{R}^{C \log(\frac{d}{\epsilon})}$$

We choose the binary matrix  $\mathbf{T}$  to be such that  $\mathbf{M}' = \mathbf{T} \odot \mathbf{M}$ . We also decompose  $\mathbf{v}$  and  $\mathbf{s}$  as

$$\mathbf{s} = \begin{bmatrix} \mathbf{s}_1 \\ \mathbf{s}_2 \\ \vdots \\ \mathbf{s}_d \end{bmatrix}, \quad \mathbf{v} = \begin{bmatrix} \mathbf{v}_1 \\ \mathbf{v}_2 \\ \vdots \\ \mathbf{v}_d \end{bmatrix}, \quad \text{where } \mathbf{s}_i, \mathbf{v}_i \in \mathbb{R}^{C \log(\frac{d}{\epsilon})}.$$

Using this notation, we can express our network as the following:

$$(\mathbf{s} \odot \mathbf{v})^T \sigma(\mathbf{M}' \mathbf{x}) = \sum_{i=1}^d (\mathbf{s}_i \odot \mathbf{v}_i)^T \sigma(\mathbf{u}_i x_i). \quad (10)$$

**Step 2: Pruning  $u$**  Let  $n = C \log(d/\epsilon)$  and define the event  $E_{i,\epsilon}$  be the following event from the Lemma 1:

$$E_{i,\epsilon} := \left\{ \sup_{w \in [-1,1]} \inf_{\mathbf{s}_i \in \{0,1\}^n} \sup_{x: |x| \leq 1} |wx - (\mathbf{v}_i \odot \mathbf{s}_i)^T \sigma(\mathbf{u}_i x)| \leq \epsilon \right\}$$

Define the event  $E_\epsilon := \bigcap_i E_{i,\epsilon}$ , the intersection of all the events. We consider the event  $E_{\frac{\epsilon}{d}}$ , where the approximation parameter is  $\frac{\epsilon}{d}$ . For each  $i$ , Lemma 1 shows that event  $E_{i,\frac{\epsilon}{d}}$  holds with probability at least  $1 - \frac{\epsilon}{d}$  because the dimension of  $\mathbf{v}_i$  and  $\mathbf{u}_i$  is at least  $C \log(d/\epsilon)$ . Taking a union bound we get that the event  $E_{\frac{\epsilon}{d}}$  holds with probability at least  $1 - \epsilon$ . On the event  $E_{\frac{\epsilon}{d}}$ , we obtain the following series of inequalities:

$$\begin{aligned} & \sup_{\|\mathbf{w}\|_\infty \leq 1} \inf_{\mathbf{s}, \mathbf{T}} \sup_{\|\mathbf{x}\|_\infty \leq 1} |\mathbf{w}^T \mathbf{x} - (\mathbf{s}_2 \odot \mathbf{v})^T \sigma((\mathbf{S}_1 \odot \mathbf{M}) \mathbf{x})| \\ & \leq \sup_{\|\mathbf{w}\|_\infty \leq 1} \inf_{\mathbf{s} \in \{0,1\}^{dn}} \sup_{\|\mathbf{x}\|_\infty \leq 1} |\mathbf{w}^T \mathbf{x} - (\mathbf{s}_2 \odot \mathbf{v})^T \sigma(\mathbf{M}' \mathbf{x})| \\ & \quad \text{(Pruning } \mathbf{M} \text{ according to Step 1 (Pre-processing } \mathbf{M}).) \\ & = \sup_{\|\mathbf{w}\|_\infty \leq 1} \inf_{\mathbf{s}_1, \dots, \mathbf{s}_d \in \{0,1\}^n} \sup_{\|\mathbf{x}\|_\infty \leq 1} \left| \sum_{i=1}^d w_i x_i - \sum_{i=1}^d (\mathbf{s}_i \odot \mathbf{v}_i)^T \sigma(\mathbf{u}_i x_i) \right| \quad \text{(Using Eq. (10))} \\ & \leq \sup_{\|\mathbf{w}\|_\infty \leq 1} \inf_{\mathbf{s}_1, \dots, \mathbf{s}_d \in \{0,1\}^n} \sup_{\|\mathbf{x}\|_\infty \leq 1} \sum_{i=1}^d |w_i x_i - (\mathbf{s}_i \odot \mathbf{v}_i)^T \sigma(\mathbf{u}_i x_i)| \\ & = \sum_{i=1}^d \sup_{|w_i| \leq 1} \inf_{\mathbf{s}_i \in \{0,1\}^n} \sup_{|x_i| \leq 1} |w_i x_i - (\mathbf{s}_i \odot \mathbf{v}_i)^T \sigma(\mathbf{u}_i x_i)| \\ & \leq \sum_{i=1}^d d \frac{\epsilon}{d} \quad \text{(By definition of the event } E_{\frac{\epsilon}{d}}) \\ & \leq \epsilon. \end{aligned}$$

□

## A.2 Approximating a single layer

In this subsection, we approximate a layer from the target network by pruning 2 layers of a randomly initialized network. The overview of the construction is given in Figure 4.

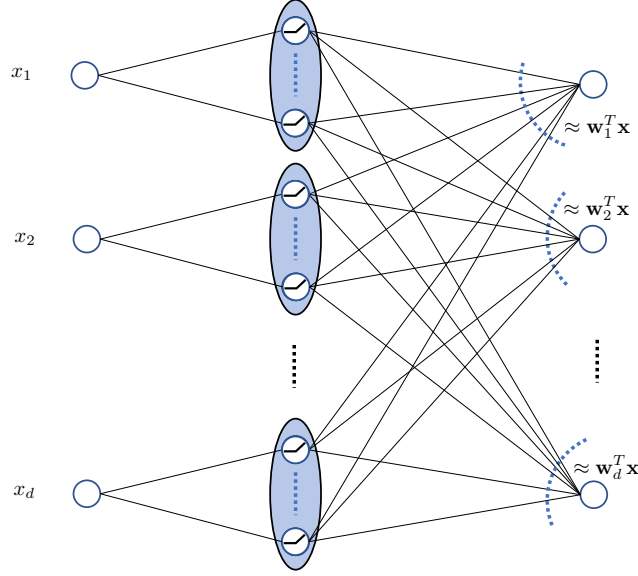

Figure 4: Approximating a layer  $\sigma(\mathbf{W}\mathbf{x})$ : A diagram showing our construction to approximate a layer. Let  $\mathbf{w}_1, \mathbf{w}_2, \dots, \mathbf{w}_d$  be the  $d$  rows of  $\mathbf{W}$ , i.e., the weights of  $d$  neurons. Our construction has an additional hidden layer, which contains  $d$  blocks (highlighted in blue), where each unit contains  $k = O(\log(\frac{d}{\epsilon}))$  neurons. We first pre-process the weights by pruning the first layer so that it has a block structure as shown. For ease of visualization, we only show two connections per block, i.e., each neuron in the  $i^{\text{th}}$  block is connected to  $x_i$  and (before pruning) all the output neurons.

**Lemma 3.** (*Approximating a layer*) Consider a randomly initialized two layer neural network  $g(\mathbf{x}) = \mathbf{N}\sigma(\mathbf{M}\mathbf{x})$  with  $\mathbf{x} \in \mathbb{R}^{d_1}$  such that  $\mathbf{N}$  has dimension  $(d_2 \times Cd_1 \log \frac{d_1 d_2}{\epsilon})$  and  $\mathbf{M}$  has dimension  $(Cd_1 \log \frac{d_1 d_2}{\epsilon} \times d_1)$ , where each weight is initialized independently from the distribution  $U[-1, 1]$ .

Let  $\hat{g}(x) = (\mathbf{S} \odot \mathbf{N})^T \sigma((\mathbf{T} \odot \mathbf{M})\mathbf{x})$  be the pruned network for a choice of pruning matrices  $\mathbf{S}$  and  $\mathbf{T}$ . If  $f_{\mathbf{W}}(\mathbf{x}) = \mathbf{W}\mathbf{x}$  is the linear (single layered) network, where  $\mathbf{W}$  has dimensions  $d_2 \times d_1$ , then with probability at least  $1 - \epsilon$ ,

$$\sup_{\mathbf{W}: \|\mathbf{W}\| \leq 1, \mathbf{W} \in \mathbb{R}^{d_2 \times d_1}} \exists \mathbf{S}, \mathbf{T} : \sup_{\mathbf{x}: \|\mathbf{x}\|_{\infty} \leq 1} \|f_{\mathbf{W}}(\mathbf{x}) - \hat{g}(\mathbf{x})\| < \epsilon.$$

*Proof.* Our proof strategy is similar to the proof in Lemma 2.

**Step 1: Pre-processing M** Similar to Lemma 2, we begin by pruning  $\mathbf{M}$  to get a block diagonal matrix  $\mathbf{M}'$ .

$$\mathbf{M}' = \begin{bmatrix} \mathbf{u}_1 & 0 & \dots & 0 \\ 0 & \mathbf{u}_2 & \dots & 0 \\ \vdots & \vdots & \dots & 0 \\ 0 & 0 & \dots & \mathbf{u}_{d_1} \end{bmatrix}, \quad \text{where } \mathbf{u}_i \in \mathbb{R}^{C \log(\frac{d_1 d_2}{\epsilon})}$$

Thus,  $\mathbf{T}$  is such that  $\mathbf{M}' = \mathbf{T} \odot \mathbf{M}$ . We also decompose  $\mathbf{N}$  and  $\mathbf{S}$  as following

$$\mathbf{S} = \begin{bmatrix} \mathbf{s}_{1,1}^T & \dots & \mathbf{s}_{1,d_1}^T \\ \mathbf{s}_{2,1}^T & \dots & \mathbf{s}_{2,d_1}^T \\ \vdots & \dots & \vdots \\ \mathbf{s}_{d_2,1}^T & \dots & \mathbf{s}_{d_2,d_1}^T \end{bmatrix}, \quad \mathbf{N} = \begin{bmatrix} \mathbf{v}_{1,1}^T & \dots & \mathbf{v}_{1,d_1}^T \\ \mathbf{v}_{2,1}^T & \dots & \mathbf{v}_{2,d_1}^T \\ \vdots & \dots & \vdots \\ \mathbf{v}_{d_2,1}^T & \dots & \mathbf{v}_{d_2,d_1}^T \end{bmatrix}, \quad \text{where } \mathbf{v}_{i,j}, \mathbf{u}_i \in \mathbb{R}^{C \log(\frac{d_1 d_2}{\epsilon})}$$

Using this notation, we get the following relation:

$$(\mathbf{S} \odot \mathbf{N})\sigma(\mathbf{M}'\mathbf{x}) = \begin{bmatrix} \sum_{j=1}^{d_1} (\mathbf{s}_{1,j} \odot \mathbf{v}_{1,j})^T \sigma(\mathbf{u}_j x_j) \\ \vdots \\ \sum_{j=1}^{d_1} (\mathbf{s}_{d_2,j} \odot \mathbf{v}_{d_2,j})^T \sigma(\mathbf{u}_j x_j) \end{bmatrix} \quad (11)$$

**Step 2: Pruning N** Note that  $\mathbf{v}_{i,j}$  and  $\mathbf{u}_i$  contain i.i.d. random variables from Uniform distribution. Let  $n = C \log(d_1 d_2 / \epsilon)$  and define  $E_{i,j,\epsilon}$  be the following event from the Lemma 1:

$$E_{i,j,\epsilon} := \left\{ \sup_{w \in [-1,1]} \inf_{\mathbf{s}_{i,j} \in \{0,1\}^n} \sup_{x: |x| \leq 1} |wx - (\mathbf{v}_{i,j} \odot \mathbf{s}_{i,j})^T \sigma(\mathbf{u}_i x)| \leq \epsilon \right\}$$

Define  $E_\epsilon := \bigcap_{1 \leq i \leq d_2} \bigcap_{1 \leq j \leq d_1} E_{i,j,\epsilon}$  to be the intersection of all individual events. Lemma 1 states that each event  $E_{i,j,\epsilon}$  holds with probability  $1 - \frac{\epsilon}{d_1 d_2}$  because  $\mathbf{u}_i$  and  $\mathbf{v}_{i,j}$  have dimensions at least  $C \log(\frac{d_1 d_2}{\epsilon})$ . By a union bound, the event  $E_{\frac{\epsilon}{d_1 d_2}}$  holds with probability  $1 - \epsilon$ . On the event  $E_{\frac{\epsilon}{d_1 d_2}}$ , we get the following inequalities:

$$\begin{aligned} & \sup_{\mathbf{W}: \|\mathbf{W}\| \leq 1} \inf_{\mathbf{S}, \mathbf{T}} \sup_{\|\mathbf{x}\|_\infty \leq 1} \|\mathbf{W}\mathbf{x} - (\mathbf{S} \odot \mathbf{N})^T \sigma((\mathbf{T} \odot \mathbf{M})\mathbf{x})\| \\ & \leq \sup_{\mathbf{W}: \|\mathbf{W}\| \leq 1} \inf_{\mathbf{S}} \sup_{\|\mathbf{x}\|_\infty \leq 1} \|\mathbf{W}\mathbf{x} - (\mathbf{S}_2 \odot \mathbf{N})^T \sigma(\mathbf{M}'\mathbf{x})\| \\ & \quad \text{(Pruning M according to Step 1 (Pre-processing M))} \\ & \leq \sup_{\mathbf{W}: \|\mathbf{W}\| \leq 1} \inf_{\mathbf{s}_{i,j} \in \{0,1\}^n} \sup_{\|\mathbf{x}\|_\infty \leq 1} \left| \sum_{i=1}^{d_2} \left| \sum_{j=1}^{d_1} w_{i,j} x_j - \sum_{j=1}^{d_1} (\mathbf{s}_{i,j} \odot \mathbf{v}_{i,j})^T \sigma(\mathbf{u}_j x_j) \right| \right| \\ & \quad \text{(Using Eq. (11))} \\ & \leq \sup_{w_{i,j}: |w_{i,j}| \leq 1} \inf_{\mathbf{s}_{i,j} \in \{0,1\}^n} \sup_{x_j: |x_j| \leq 1} \sum_{i=1}^{d_2} \sum_{j=1}^{d_1} |w_{i,j} x_j - (\mathbf{s}_{i,j} \odot \mathbf{v}_{i,j})^T \sigma(\mathbf{u}_j x_j)| \\ & \leq \sup_{w_{i,j}: |w_{i,j}| \leq 1} \inf_{\mathbf{s}_{i,j} \in \{0,1\}^n} \sum_{i=1}^{d_2} \sum_{j=1}^{d_1} \sup_{x_j: |x_j| \leq 1} |w_{i,j} x_j - (\mathbf{s}_{i,j} \odot \mathbf{v}_{i,j})^T \sigma(\mathbf{u}_j x_j)| \\ & = \sum_{i=1}^{d_2} \sum_{j=1}^{d_1} \sup_{w_{i,j}: |w_{i,j}| \leq 1} \inf_{\mathbf{s}_{i,j} \in \{0,1\}^n} \sup_{x_j: |x_j| \leq 1} |w_{i,j} x_j - (\mathbf{s}_{i,j} \odot \mathbf{v}_{i,j})^T \sigma(\mathbf{u}_j x_j)| \\ & \leq d_1 d_2 \frac{\epsilon}{d_1 d_2} \leq \epsilon. \quad \text{(By definition of the event } E_{\frac{\epsilon}{d_1 d_2}}) \end{aligned}$$

□

### A.3 Proof of Theorem 1

We now state the proof of Theorem 1 with the help of the lemmas in the previous subsection.

*Proof.* (Proof of Theorem 1) Let  $\mathbf{x}_i$  be the input to the  $i$ -th layer of  $f_{(\mathbf{w}_1, \dots, \mathbf{w}_l)}(\mathbf{x})$ . Thus,

1.  $\mathbf{x}_1 = \mathbf{x}$ ,
2. for  $1 \leq i \leq l-1$ ,  $\mathbf{x}_{i+1} = \sigma(\mathbf{W}_i \mathbf{x}_i)$ .

Thus  $f_{(\mathbf{w}_1, \dots, \mathbf{w}_l)}(\mathbf{x}) = \mathbf{W}_l \mathbf{x}_l$ .

For  $i^{\text{th}}$  layer weights  $\mathbf{W}_i$ , let  $\mathbf{S}_{2i}$  and  $\mathbf{S}_{2i-1}$  be the binary matrices that achieve the guarantee in Lemma 3. Lemma 3 states that with probability  $1 - \frac{\epsilon}{2l}$  the following event holds:

$$\sup_{\mathbf{W}_i \in \mathbb{R}^{d_{i+1} \times d_i}: \|\mathbf{W}_i\| \leq 1} \exists \mathbf{S}_{2i}, \mathbf{S}_{2i-1} : \sup_{\mathbf{x}: \|\mathbf{x}\| \leq 1} \|\mathbf{W}_i \mathbf{x} - (\mathbf{M}_{2i} \odot \mathbf{S}_{2i}) \sigma((\mathbf{S}_{2i} \odot \mathbf{M}_{2i-1})\mathbf{x})\| < \epsilon/2l. \quad (12)$$

As ReLU is 1-Lipschitz, the above event implies the following:

$$\sup_{\mathbf{W}_i \in \mathbb{R}^{d_{i+1} \times d_i} : \|\mathbf{W}_i\| \leq 1} \exists \mathbf{S}_{2i}, \mathbf{S}_{2i-1} : \sup_{\mathbf{x} : \|\mathbf{x}\| \leq 1} \|\sigma(\mathbf{W}_i \mathbf{x}) - \sigma((\mathbf{M}_{2i} \odot \mathbf{S}_{2i}) \sigma((\mathbf{S}_{2i} \odot \mathbf{M}_{2i-1}) \mathbf{x}))\| < \epsilon/2l. \quad (13)$$

Taking a union bound, we get that with probability  $1 - \epsilon$ , the above inequalities (12) and (13) hold for every layer simultaneously. For the remainder of the proof, we will assume that this event holds. For the any fixed function  $f$ , let  $g_f = g_{(\mathbf{w}_l, \dots, \mathbf{w}_1)}$  be the pruned network constructed layer-wise, by pruning with binary matrices satisfying Eq. (12) and Eq. (13), and let these pruned matrices be  $\mathbf{M}'_i$ . Let  $\mathbf{x}'_i$  be the input to the  $2i - 1$ -th layer of  $g_f$ . We note that  $\mathbf{x}'_i$  satisfies the following recurrent relations:

1.  $\mathbf{x}'_1 = \mathbf{x}$ ,
2. for  $1 \leq i \leq l - 1$ ,  $\mathbf{x}'_{i+1} = \sigma(\mathbf{M}'_{2i} \sigma(\mathbf{M}'_{2i-1} \mathbf{x}'_i))$ .

Because the input  $\mathbf{x}$  has  $\|\mathbf{x}\| \leq 1$ , Equation (13) also states that  $\|\mathbf{x}'_i\| \leq (1 + \frac{\epsilon}{2l})^{i-1}$ . To see this, note that we use Equation (13) to get for  $1 \leq i \leq l - 1$  as

$$\begin{aligned} \|\sigma(\mathbf{W}_i \mathbf{x}'_i) - \mathbf{x}'_{i+1}\| &\leq \|\mathbf{x}'_i\| (\epsilon/2l) \\ \implies \|\mathbf{x}'_{i+1}\| &\leq \|\mathbf{x}'_i\| (\epsilon/2l) + \|\sigma(\mathbf{W}_i \mathbf{x}'_i)\| \leq \|\mathbf{x}'_i\| (\epsilon/2l) + \|\mathbf{W}_i \mathbf{x}'_i\| \leq \|\mathbf{x}'_i\| (\epsilon/2l) + \|\mathbf{x}'_i\|. \end{aligned}$$

Applying this inequality recursively, we get the claim that for  $1 \leq i \leq l - 1$ ,  $\|\mathbf{x}'_i\| \leq (1 + \frac{\epsilon}{2l})^{i-1}$ . Using this, we can bound the error between  $\mathbf{x}_i$  and  $\mathbf{x}'_i$ . For  $1 \leq i \leq l - 1$ ,

$$\begin{aligned} \|\mathbf{x}_{i+1} - \mathbf{x}'_{i+1}\| &= \|\sigma(\mathbf{W}_i \mathbf{x}_i) - \sigma(\mathbf{M}'_{2i} \sigma(\mathbf{M}'_{2i-1} \mathbf{x}'_i))\| \\ &\leq \|\sigma(\mathbf{W}_i \mathbf{x}_i) - \sigma(\mathbf{W}_i \mathbf{x}'_i)\| + \|\sigma(\mathbf{W}_i \mathbf{x}'_i) - \sigma(\mathbf{M}'_{2i} \sigma(\mathbf{M}'_{2i-1} \mathbf{x}'_i))\| \\ &\leq \|\mathbf{x}_i - \mathbf{x}'_i\| + \|\mathbf{W}_i \mathbf{x}'_i - \mathbf{M}'_{2i} \sigma(\mathbf{M}'_{2i-1} \mathbf{x}'_i)\| \\ &< \|\mathbf{x}_i - \mathbf{x}'_i\| + \left(1 + \frac{\epsilon}{2l}\right)^{i-1} \frac{\epsilon}{2l}, \end{aligned}$$

where we use Equation (12). Unrolling this we get

$$\|\mathbf{x}_l - \mathbf{x}'_l\| \leq \sum_{i=1}^{l-1} \left(1 + \frac{\epsilon}{2l}\right)^{i-1} \frac{\epsilon}{2l}.$$

Finally using the inequality above, we get that with probability at least  $1 - \epsilon$ ,

$$\begin{aligned} \|f_{(\mathbf{w}_l, \dots, \mathbf{w}_1)}(\mathbf{x}) - g_{(\mathbf{w}_l, \dots, \mathbf{w}_1)}(\mathbf{x})\| &= \|\mathbf{W}_l \mathbf{x}_l - \mathbf{M}'_{2l} \sigma(\mathbf{M}'_{2l-1} \mathbf{x}'_l)\| \\ &\leq \|\mathbf{W}_l \mathbf{x}_l - \mathbf{W}_l \mathbf{x}'_l\| + \|\mathbf{W}_l \mathbf{x}'_l - \mathbf{M}'_{2l} \sigma(\mathbf{M}'_{2l-1} \mathbf{x}'_l)\| \\ &\leq \|\mathbf{x}_l - \mathbf{x}'_l\| + \|\mathbf{W}_l \mathbf{x}'_l - \mathbf{M}'_{2l} \sigma(\mathbf{M}'_{2l-1} \mathbf{x}'_l)\| \\ &< \|\mathbf{x}_l - \mathbf{x}'_l\| + \left(1 + \frac{\epsilon}{2l}\right)^{l-1} \frac{\epsilon}{2l} \\ &\leq \left(\sum_{i=1}^{l-1} \left(1 + \frac{\epsilon}{2l}\right)^{i-1} \frac{\epsilon}{2l}\right) + \left(1 + \frac{\epsilon}{2l}\right)^{l-1} \frac{\epsilon}{2l} \\ &\leq \sum_{i=1}^l \left(1 + \frac{\epsilon}{2l}\right)^{i-1} \frac{\epsilon}{2l} \\ &= \left(1 + \frac{\epsilon}{2l}\right)^l - 1 \\ &< e^{\epsilon/2} - 1 \\ &< \epsilon. \end{aligned} \quad (\text{Since } \epsilon < 1.)$$

Replacing  $\epsilon$  in this proof with  $\min\{\epsilon, \delta\}$  gives us the statement of the theorem.  $\square$

## B Proof of Lower Bound

*Proof.* (Proof of Theorem 2) Firstly, note that  $h_{\mathbf{W}}(\mathbf{x}) = \mathbf{W}\mathbf{x}$ . Another fact we use in this proof is that matrices  $\mathbf{W}$  of dimension  $d \times d$  can be considered as points in the space  $\mathbb{R}^{d \times d} \equiv \mathbb{R}^{d^2}$ . The metric that we would be using on this space would be the operator norm of matrices  $\|\cdot\|$ . Note that  $\mathcal{G}$  is a random set of functions, but we abuse the notation by using  $|\mathcal{G}|$  denote the *maximum* number of sub-networks that can be formed, starting from any initialization with the given architecture.

**Step 1: Packing argument.** Consider the normed space of  $d \times d$  matrices,  $\mathcal{W} = \{\mathbf{W} \in \mathbb{R}^{d \times d} : \|\mathbf{W}\| \leq 1\}$ , with the operator norm  $\|\cdot\|$ . Let  $\mathcal{P}$  be a  $2\epsilon$ -separated set of  $(\mathcal{W}, \|\cdot\|)$ , i.e.  $\mathcal{P} \subset \mathcal{W}$  and  $\|\mathbf{M} - \mathbf{M}'\| > 2\epsilon$  for all distinct  $\mathbf{M}, \mathbf{M}' \in \mathcal{P}$ .

Note that any function  $g'$  can only approximate at most one member of  $\mathcal{P}$ . To see this, let us assume on the contrary that a  $g'$  can approximate two distinct members  $\mathbf{W}_1$  and  $\mathbf{W}_2$  of  $\mathcal{P}$ . Then a triangle inequality states that

$$\|\mathbf{W}_1 - \mathbf{W}_2\| = \sup_{\mathbf{x}: \|\mathbf{x}\| \leq 1} \|\mathbf{W}_1\mathbf{x} - \mathbf{W}_2\mathbf{x}\| \leq \sup_{\mathbf{x}: \|\mathbf{x}\| \leq 1} \|g'(\mathbf{x}) - \mathbf{W}_1\mathbf{x}\| + \sup_{\mathbf{x}: \|\mathbf{x}\| \leq 1} \|g'(\mathbf{x}) - \mathbf{W}_2\mathbf{x}\| \leq 2\epsilon,$$

which is a contradiction to the definition of a  $2\epsilon$ -separated set. Hence,  $g'$  can approximate at most only one member of  $\mathcal{P}$ .

**Step 2: Relation between  $|\mathcal{G}|$  and  $|\mathcal{P}|$ .** The goal of this step is to show that, under the theorem assumptions,  $|\mathcal{P}| < 2|\mathcal{G}|$ . If  $|\mathcal{P}| > 2|\mathcal{G}|$ , then we show that one of the matrices in  $\mathcal{P}$  is the difficult matrix  $W$  that we're looking for.

Let us assume that  $|\mathcal{P}| > 2|\mathcal{G}|$ . Recall that the previous step states that, for any realization of  $g$ , the corresponding  $\mathcal{G}$  can only approximate at most  $|\mathcal{G}|$  matrices in  $\mathcal{P}$ . Therefore, for a fixed realization of  $\mathcal{G}$ , we get that

$$\frac{\sum_{\mathbf{W} \in \mathcal{P}} \mathbb{I}(\exists g' \in \mathcal{G} : \sup_{\mathbf{x}: \|\mathbf{x}\| \leq 1} \|g'(\mathbf{x}) - \mathbf{W}\mathbf{x}\| \leq \epsilon)}{|\mathcal{P}|} \leq \frac{|\mathcal{G}|}{|\mathcal{P}|} < \frac{1}{2}.$$

Taking the expectation over the distribution of  $g$ , we get that

$$\frac{\sum_{\mathbf{W} \in \mathcal{P}} \mathbb{P}(\exists g' \in \mathcal{G} : \sup_{\mathbf{x}: \|\mathbf{x}\| \leq 1} \|g'(\mathbf{x}) - \mathbf{W}\mathbf{x}\| \leq \epsilon)}{|\mathcal{P}|} < \frac{1}{2}.$$

As the minimum is less than the average, there exists a  $\mathbf{W} \in \mathcal{P}$  such that  $\mathbb{P}(\exists g' \in \mathcal{G} : \sup_{\mathbf{x}: \|\mathbf{x}\| \leq 1} \|g'(\mathbf{x}) - \mathbf{W}\mathbf{x}\| \leq \epsilon) < \frac{1}{2}$ , which is a contradiction to Eq. (9). Therefore,  $2|\mathcal{G}| > |\mathcal{P}|$ .

**Step 3: Lower bound on  $|\mathcal{P}|$ .** We will now choose  $\mathcal{P}$  with the maximum cardinality of all  $2\epsilon$ -separated sets, i.e., that achieves the packing number. As packing number is lower bounded by the covering number, we will try to find a lower bound on the size of an  $2\epsilon$ -net of  $\mathcal{W}$  [38, Lemma 4.2.8]. Now, any  $2\epsilon$ -cover has to have at least  $\frac{\text{Vol}(\{\mathbf{W}: \|\mathbf{W}\| \leq 1\})}{\text{Vol}(\{\mathbf{W}: \|\mathbf{W}\| \leq 2\epsilon\})}$  elements, where the volume is the Lebesgue measure in  $\mathbb{R}^{d \times d} = \mathbb{R}^{d^2}$ . We also have that  $\text{Vol}(\{\mathbf{W} : \|\mathbf{W}\| \leq c\}) > 0$  because  $\{\mathbf{W} : \|\mathbf{W}\| \leq c\}$  contains  $\{\mathbf{W} : \|\mathbf{W}\|_{\text{Frobenius}} \leq c\}$ . Thus, we get that  $\frac{\text{Vol}(\{\mathbf{W}: \|\mathbf{W}\| \leq 1\})}{\text{Vol}(\{\mathbf{W}: \|\mathbf{W}\| \leq 2\epsilon\})} = (2\epsilon)^{-d^2}$ . Putting everything together, we get that

$$2|\mathcal{G}| > |\mathcal{P}| > |\mathcal{N}(\mathcal{W}, \|\cdot\|, 2\epsilon)| \geq \left(\frac{1}{2\epsilon}\right)^{-d^2}.$$

**Case  $l = 2$**  Let the dimension of  $\mathbf{M}_2$  be  $d \times s$  and the dimension of  $\mathbf{M}_1$  be  $s \times d$ . We need a lower bound on  $s$ . Now, the number of matrices that can be created by pruning  $\mathbf{M}_2$  are  $2^{sd}$  and similarly the number of matrices that can be created by pruning  $\mathbf{M}_1$  are  $2^{sd}$ . Thus, the total number of ReLUs that can be formed by pruning  $\mathbf{M}_2$  and  $\mathbf{M}_1$  is at most  $2^{2sd}$ . Thus,  $|\mathcal{G}| \leq 2^{2sd}$ . Therefore, we get that

$$2^{2sd+1} > \left(\frac{1}{2\epsilon}\right)^{-d^2}.$$

This shows that  $s = \Omega(d \log(\frac{1}{2\epsilon}))$  is needed to approximate every function in  $\mathcal{F}$  by pruning  $g$  with probability  $1/2$ .

**Case  $l > 2$**  Let the total number of parameters be  $m$ . Therefore, we get that  $|\mathcal{G}| \leq 2^m$ . Following the same arguments as before, we get that  $m = \Omega\left(d^2 \log\left(\frac{1}{2\epsilon}\right)\right)$ .  $\square$

## C Subset sum results

### C.1 Product of uniform distributions contains a uniform distribution

**Lemma 4.** *Let  $X \sim U[0, 1]$  (or  $X \sim U[-1, 0]$ ) and  $Y \in U[-1, 1]$  be independent random variables. Then the PDF of the random variable  $XY$  is*

$$f_{XY}(z) = \begin{cases} \frac{1}{2} \log \frac{1}{|z|} & |z| \leq 1 \\ 0 & \text{otherwise} \end{cases}$$

*Proof.* It is easy to see why  $f_{XY}(z) = 0$  for  $z > 1$ . We prove for  $X \sim U[0, 1]$ . The proof for  $X \sim U[-1, 0]$  is similar.

Let us first try to find the CDF of  $XY$ .

Let  $0 \leq z \leq 1$  be a real number. Note that  $XY \leq 1$ . Now, if  $XY \leq z$ , and if  $Y \geq z$ , then  $X \leq z/Y$ . However, if  $Y < z$ , then  $X$  can be anything in its support  $[0, 1]$ . Thus,

$$\begin{aligned} F_{XY}(z) &= \mathbb{P}(XY \leq z) \\ &= \int_0^z \frac{1}{2} \int_0^1 1 dx dy + \int_z^1 \frac{1}{2} \int_0^{z/y} 1 dx dy \\ &= \frac{z}{2} + \frac{1}{2} \int_z^1 \frac{z}{y} dy \\ &= \frac{z}{2} - \frac{z \log z}{2}. \end{aligned}$$

Differentiating this, the pdf for  $0 \leq z \leq 1$  is

$$f_{XY}(z) = \frac{1}{2} \log \frac{1}{z}.$$

Now, because  $XY$  is symmetric around 0, we get that for  $|z| \leq 1$

$$f_{XY}(z) = \frac{1}{2} \log \frac{1}{|z|}.$$

$\square$

**Corollary 1.** *Let  $X \sim U[0, 1]$  (or  $X \sim U[-1, 0]$ ) and  $Y \in U[-1, 1]$  be independent random variables. Let  $P$  be the distribution of  $XY$ . Let  $\delta_0$  be the Dirac-delta function. Define a distribution  $D = \frac{1}{2}\delta_0 + \frac{1}{2}P$ .*

*Then, there exists a distribution  $Q$  such that*

$$P = \left(\frac{1}{2} \log 2\right) U\left[-\frac{1}{2}, \frac{1}{2}\right] + \left(1 - \frac{1}{2} \log 2\right) Q$$

*Proof.* The corollary follows from the observation that Lemma 4 shows that pdf of  $P$  is lower bounded by  $(\log 2)U\left[-\frac{1}{2}, \frac{1}{2}\right]$  on  $\left[-\frac{1}{2}, \frac{1}{2}\right]$ .  $\square$

### C.2 Subset sum problem with product of uniform distributions

**Corollary 2** ([31]). *Let  $X_1, \dots, X_n$  be i.i.d. from the distribution in the hypothesis of Corollary 1, where  $n \geq C \log \frac{2}{\epsilon}$  (for some universal constant  $C$ ). Then, with probability at least  $1 - \epsilon$ , we have*

$$\forall z \in [-1, 1], \quad \exists S \subset [n] \text{ such that } \left| z - \sum_{i \in S} X_i \right| \leq \epsilon.$$

*Proof.* This is a direct application of Markov's inequality on Corollary 3.3 from [31] applied to the distribution in the hypothesis of Corollary 1.  $\square$
